# Supplementary material for: N-Phenyl Cinnamamide Derivatives Protect Hepatocytes against Oxidative Stress by Inducing Cellular Glutathione Synthesis via Nuclear Factor (Erythroid-Derived 2)-Like 2 Activation
Source: MDPI journal article supplement (doi:10.3390/molecules26041027), 2021-02-15

## Supplementary Material

### ***N*-Phenyl cinnamamide derivatives protect hepatocytes against oxidative stress by inducing cellular glutathione synthesis via nuclear factor(erythroid-derived 2)-like 2 activation**

Sou Hyun Kim <sup>1,+</sup>, Minwoo Kim <sup>2,+</sup>, Doyoung Kwon <sup>1,+</sup>, Jae Sung Pyo <sup>2</sup>, Joo Hyun Kim <sup>3</sup>, Jae-Hwan Kwak <sup>2,\*</sup>, Young-Suk Jung <sup>1,\*</sup>

<sup>1</sup>College of Pharmacy, Pusan National University, Busan, 46241, Republic of Korea

<sup>2</sup>College of Pharmacy, Kyungsung University, Busan, 48434, Republic of Korea

<sup>3</sup>Department of Polymer Engineering, Pukyong National University, Busan, 48547, Republic of Korea

\*Correspondence: jhkwak@ks.ac.kr (J.-H.K.); youngjung@pusan.ac.kr (Y.-S.J.)

+ These authors contributed equally to this work.

3112.52  
3097.06  
3034.56  
3026.44  
3017.81  
3014.45  
3010.72  
2958.52  
2954.94  
2952.91  
2929.02  
2920.34

2618.49  
2603.04

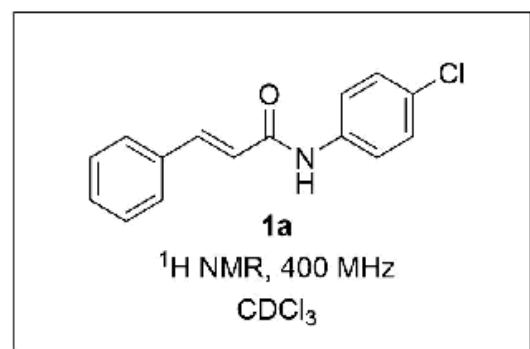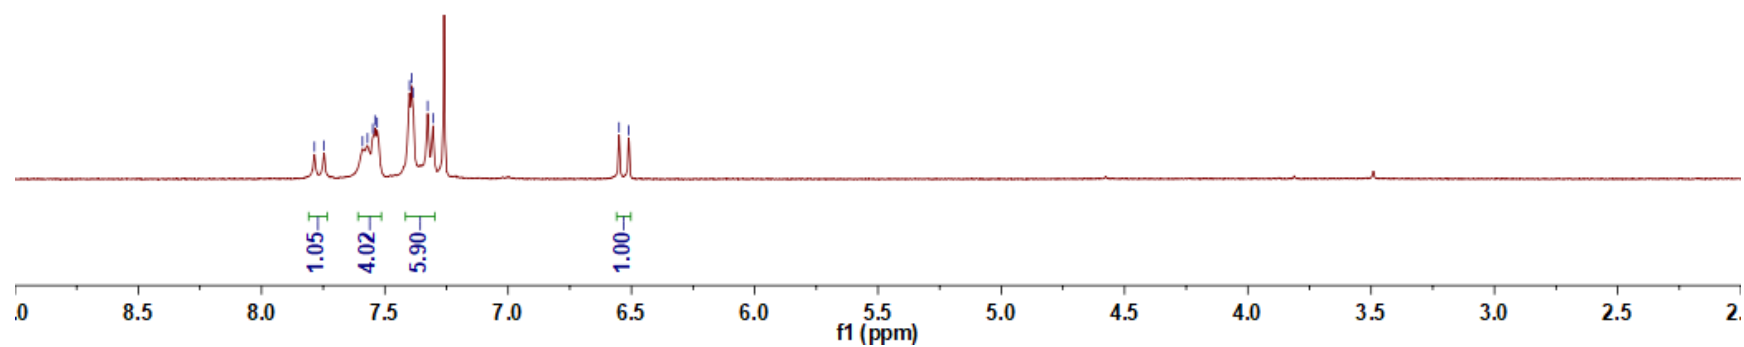

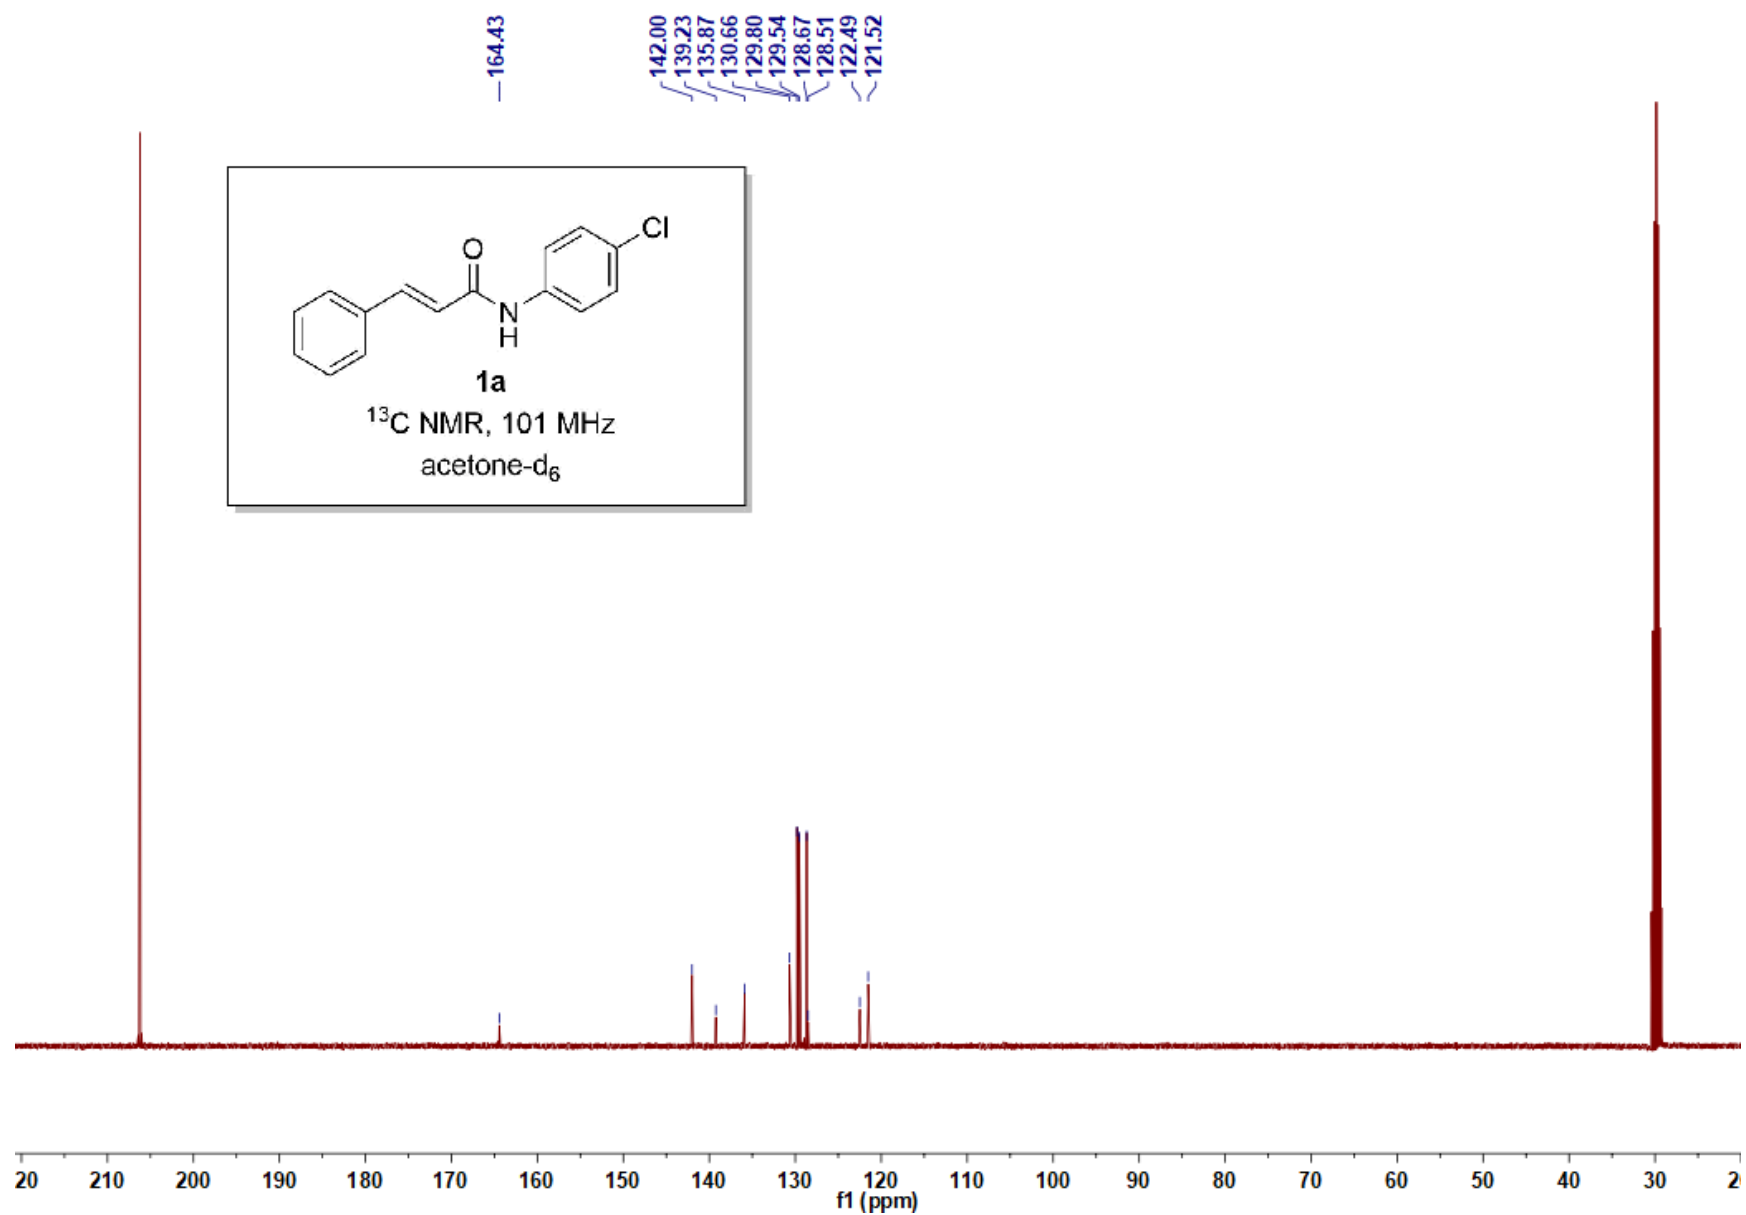



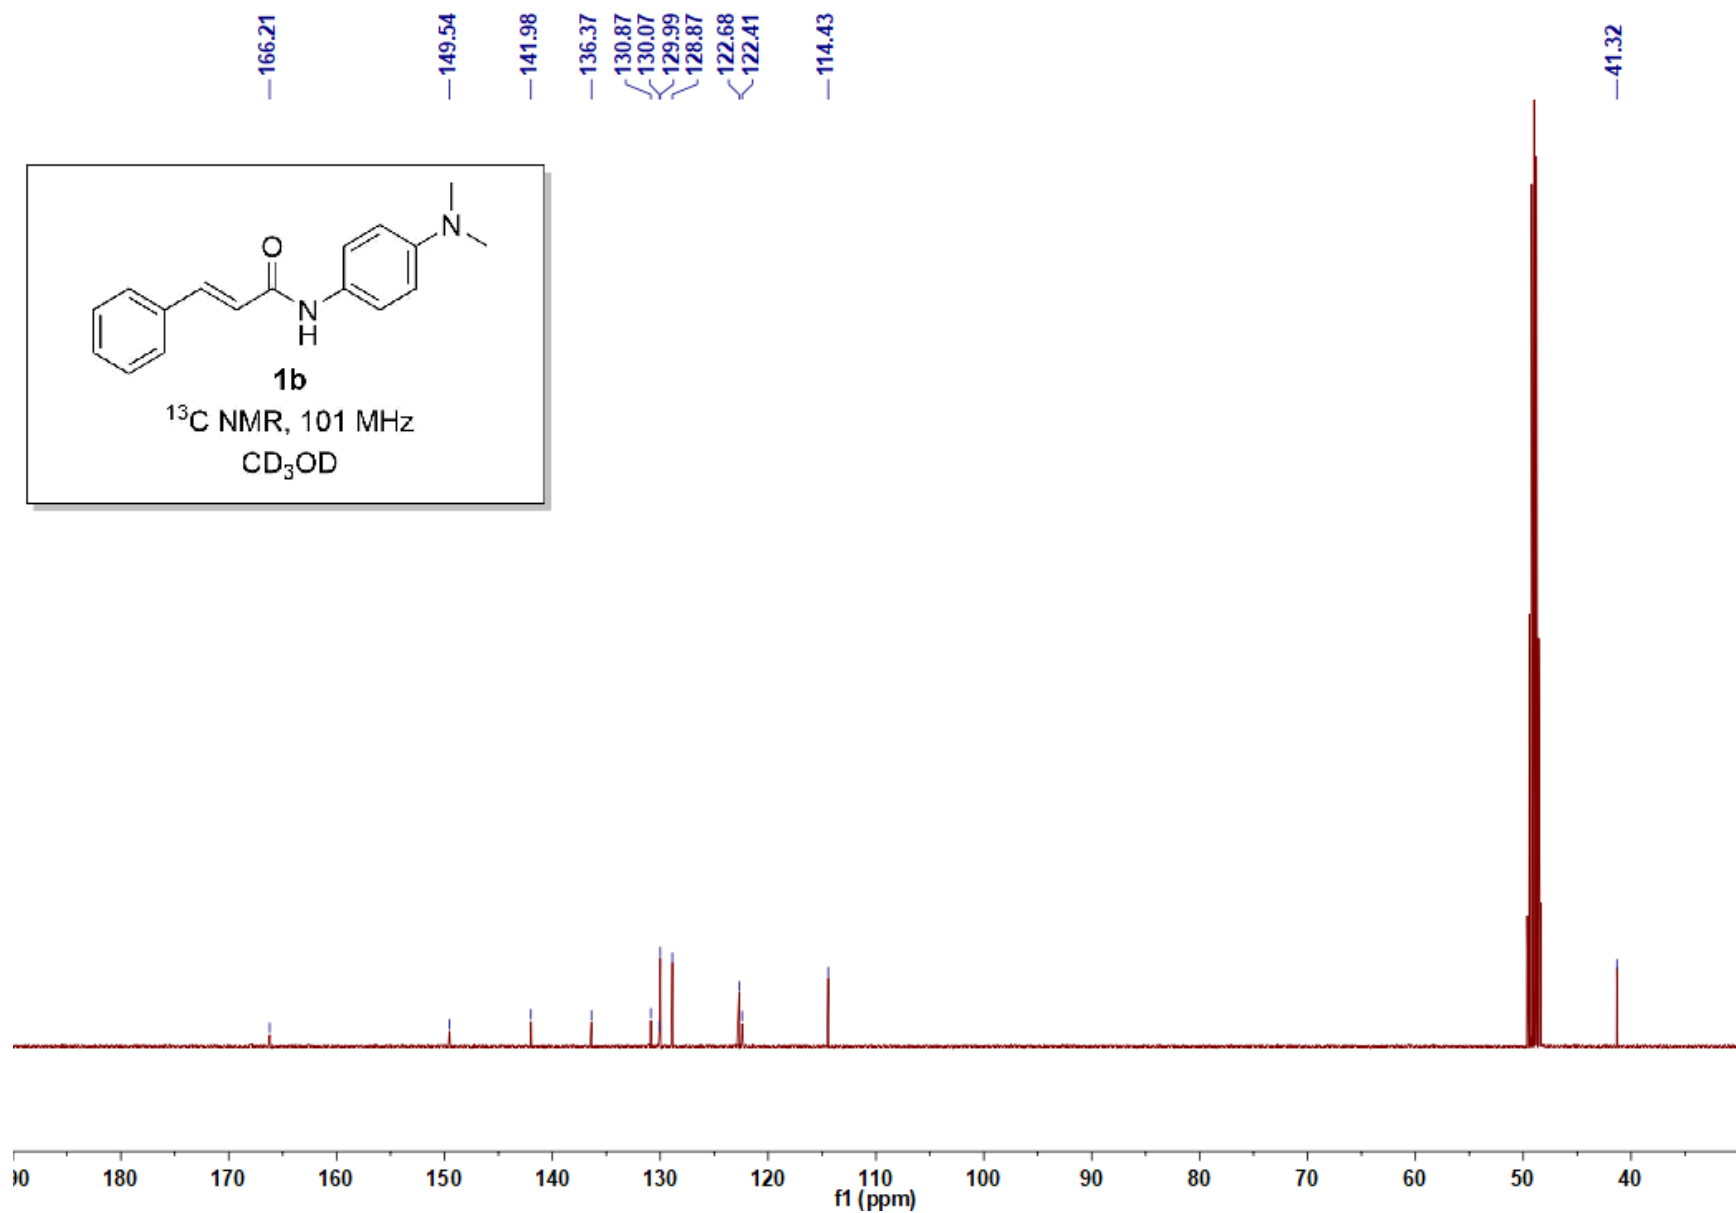

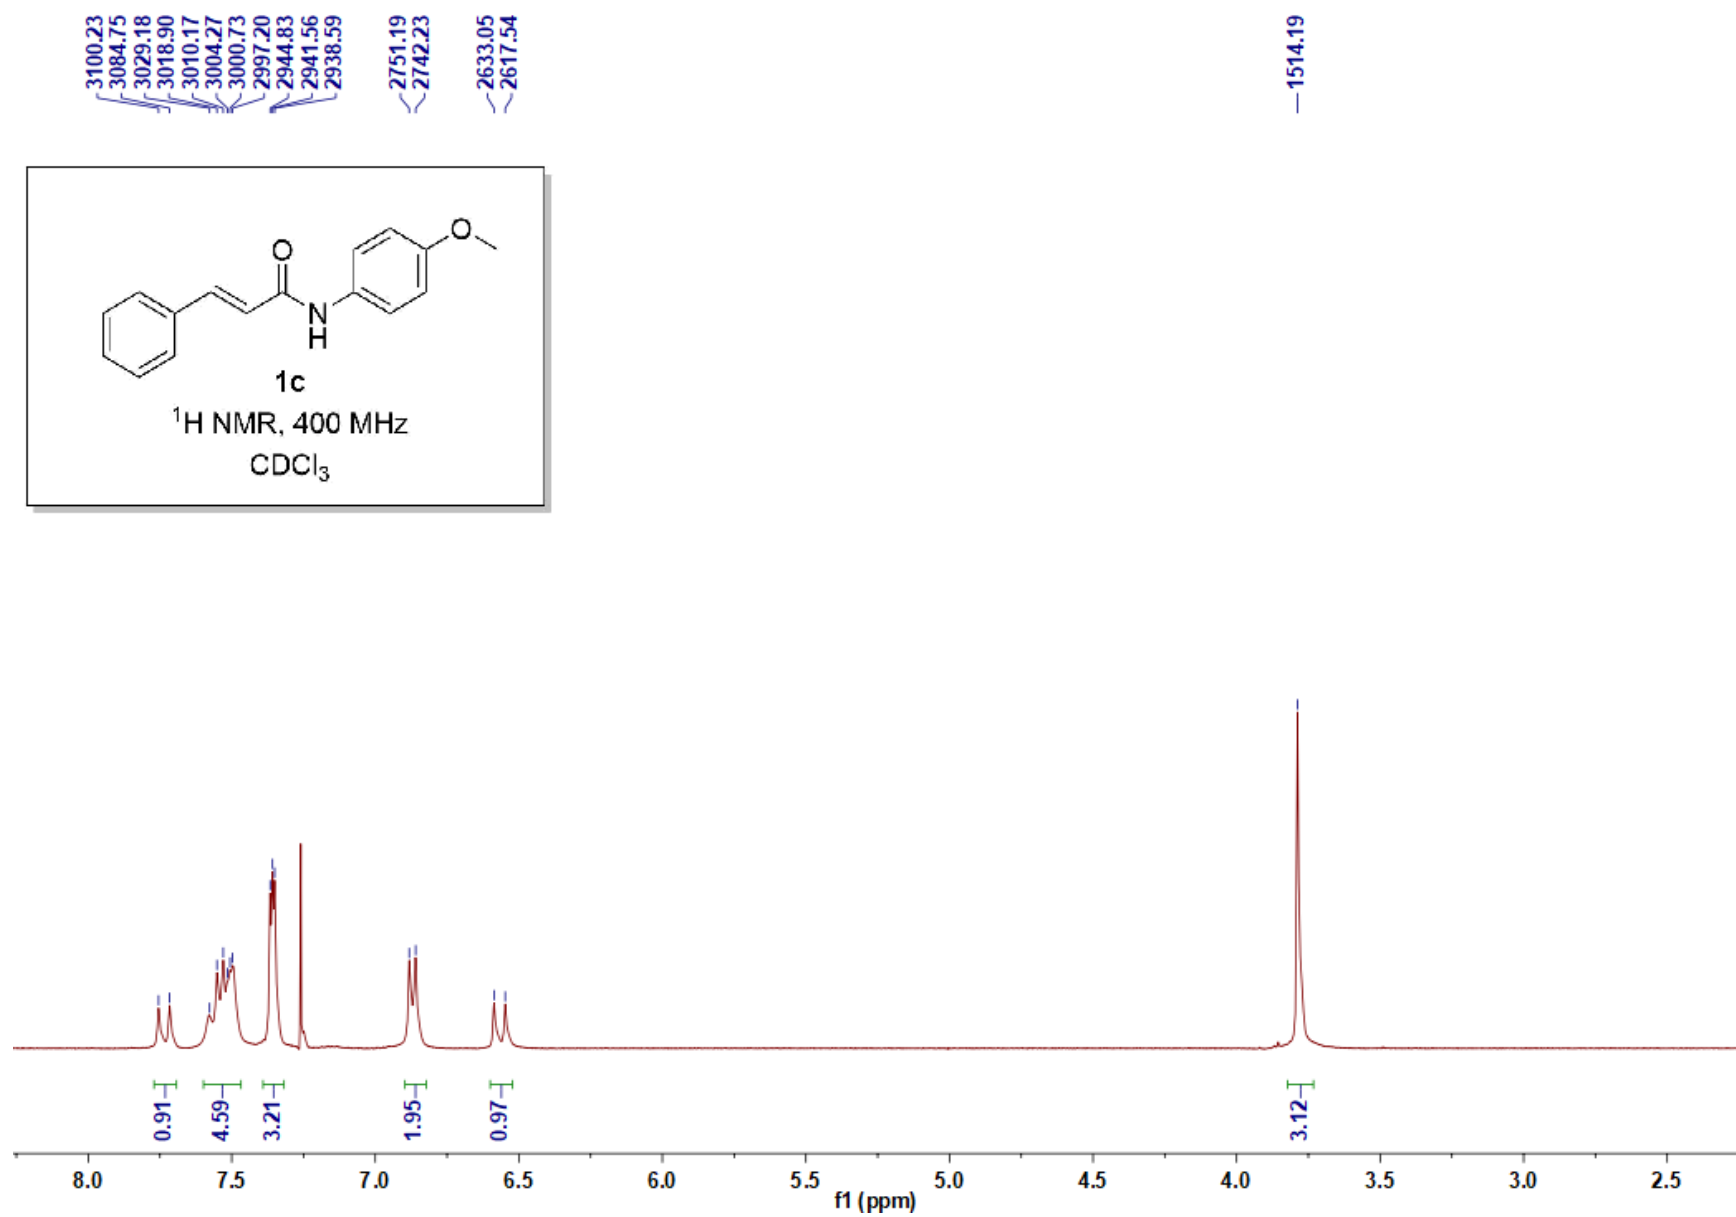

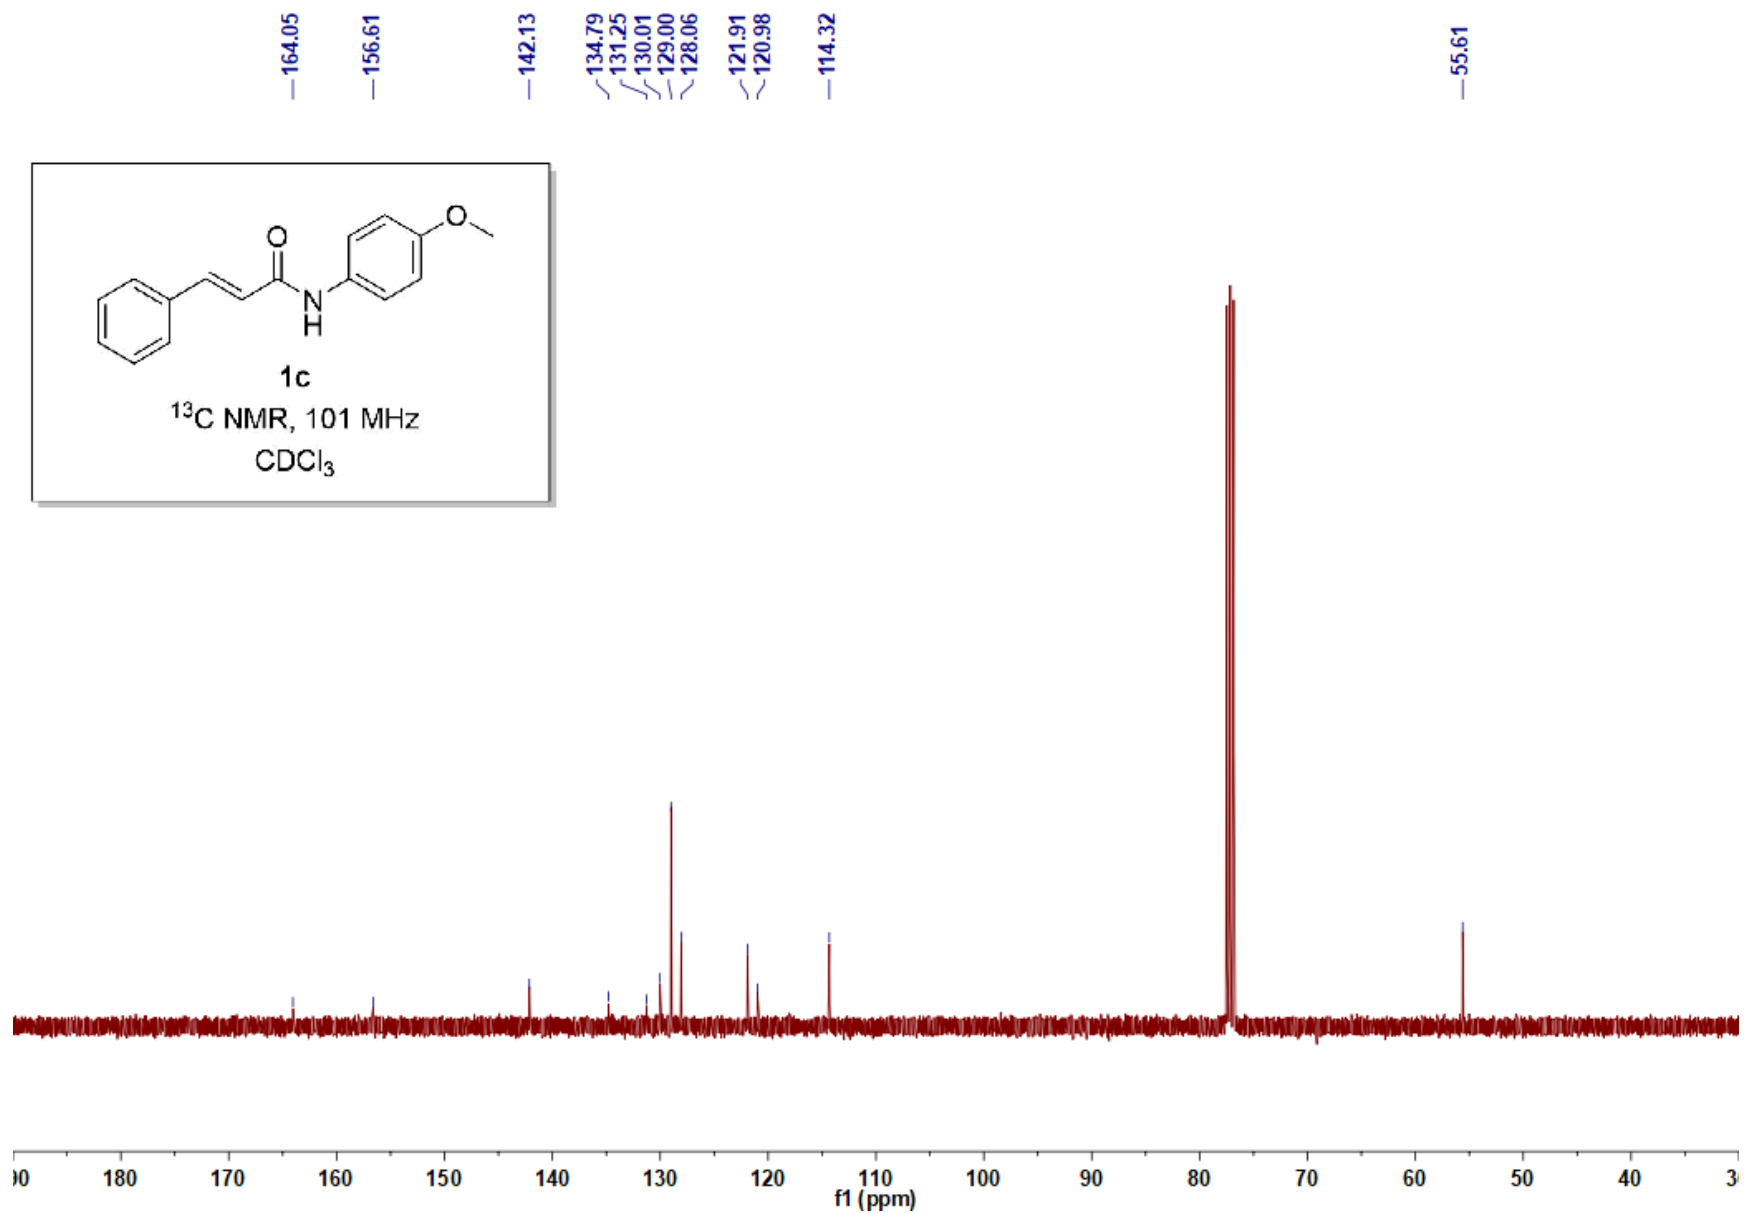

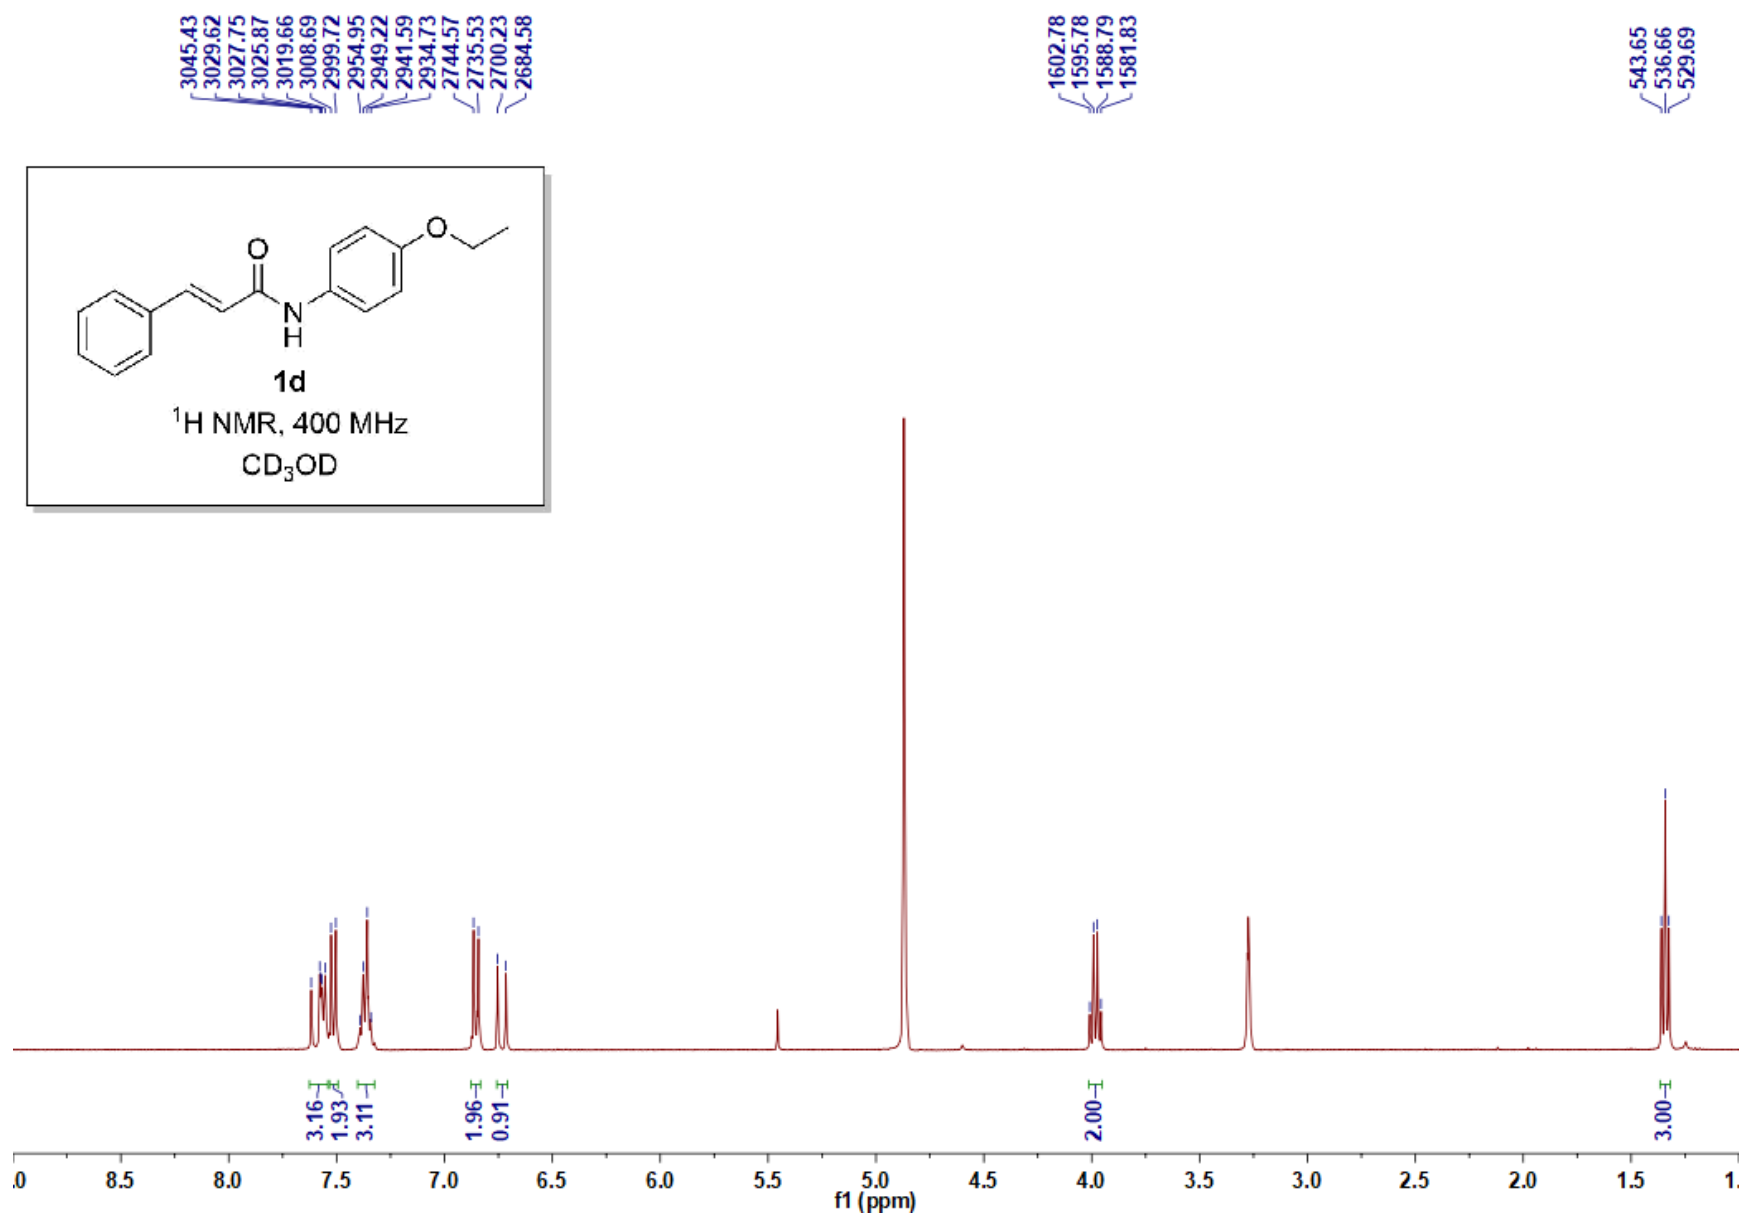



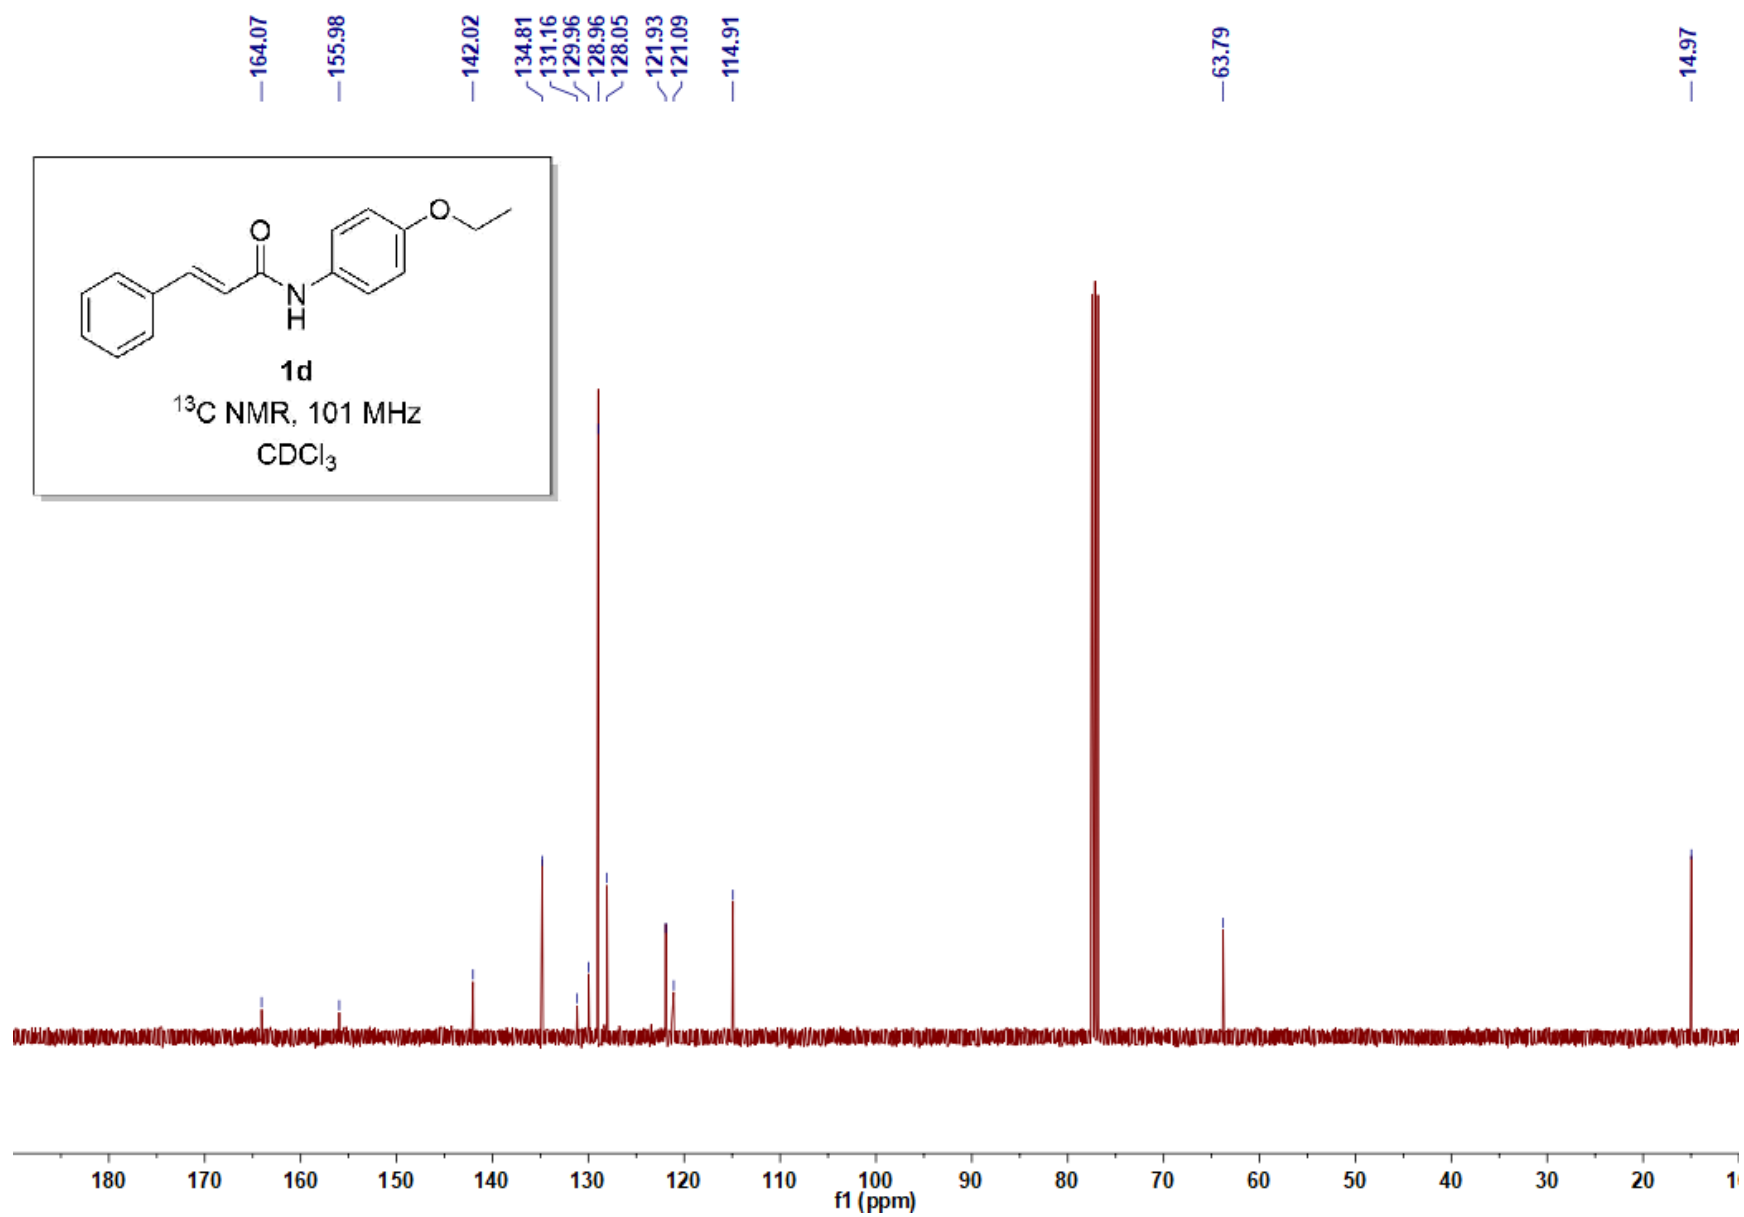

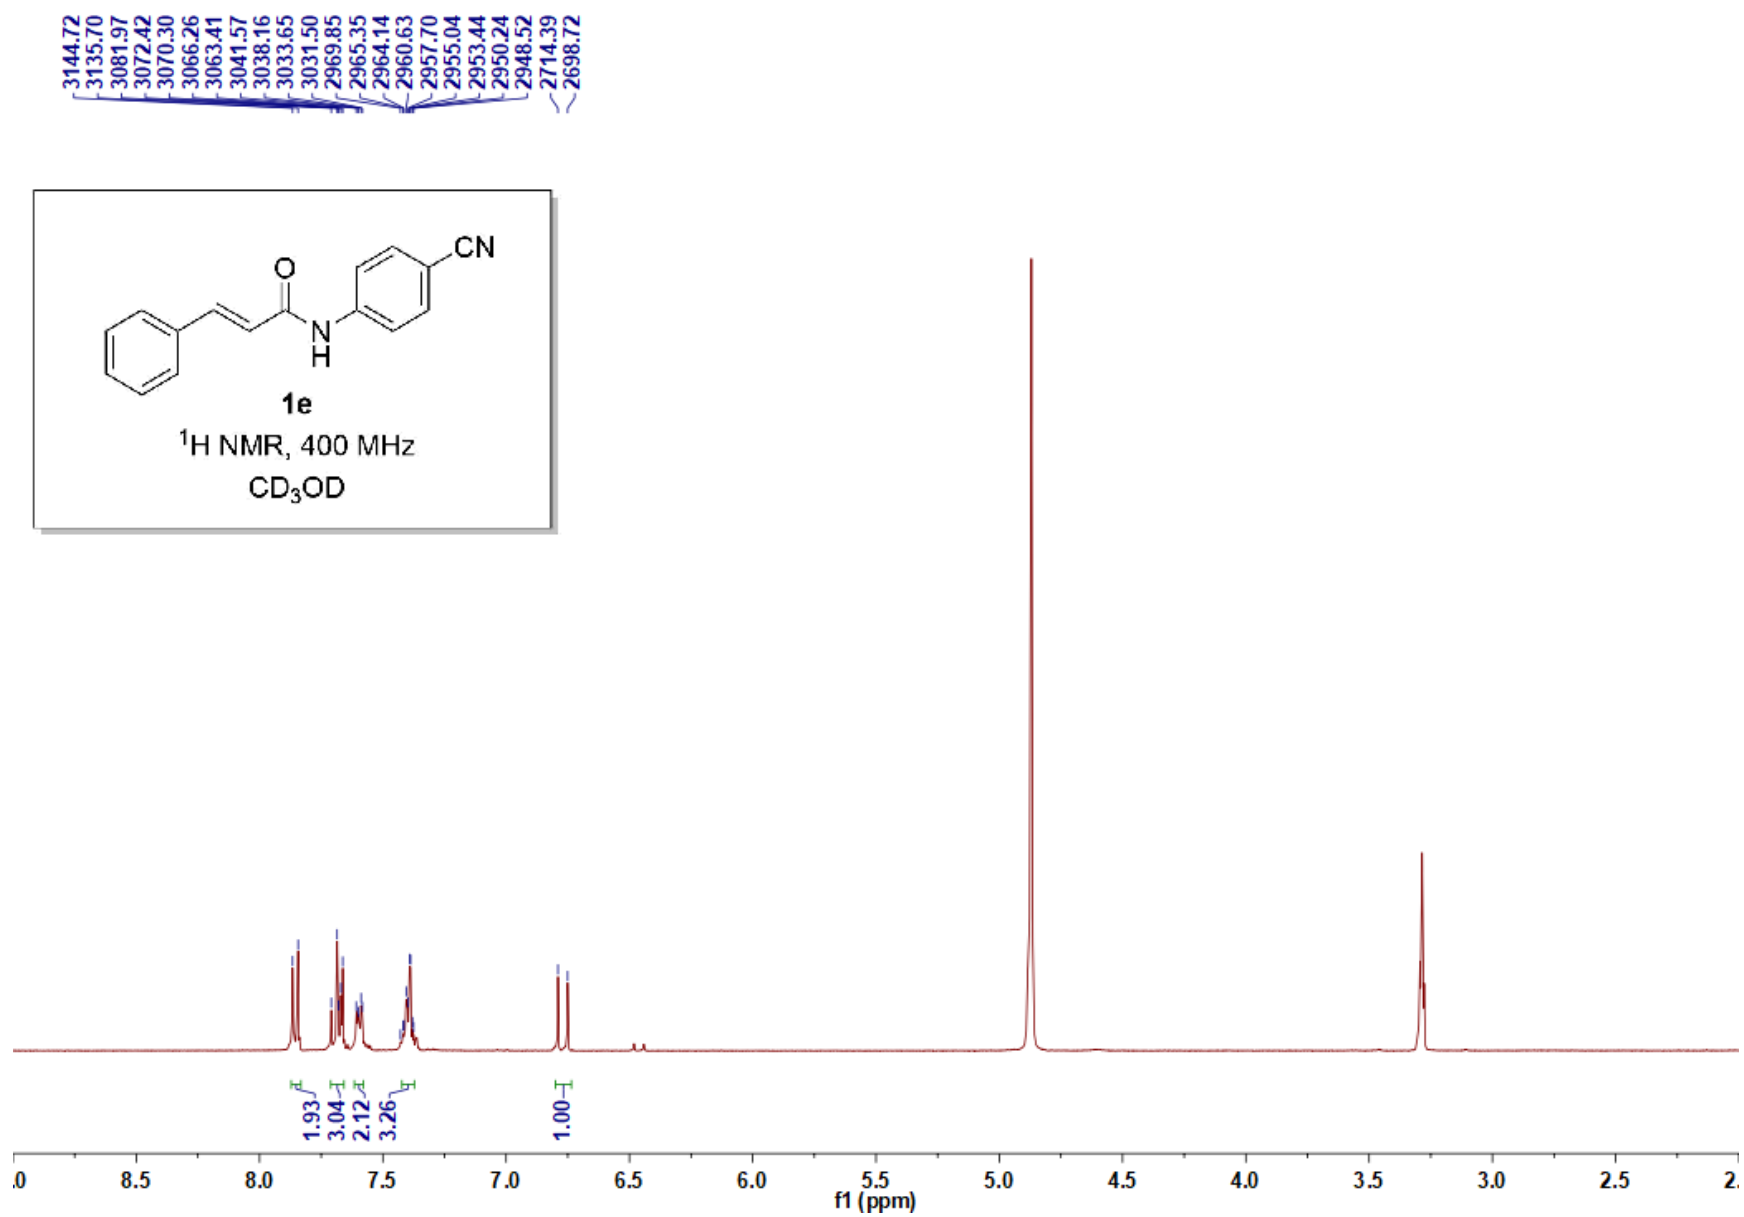

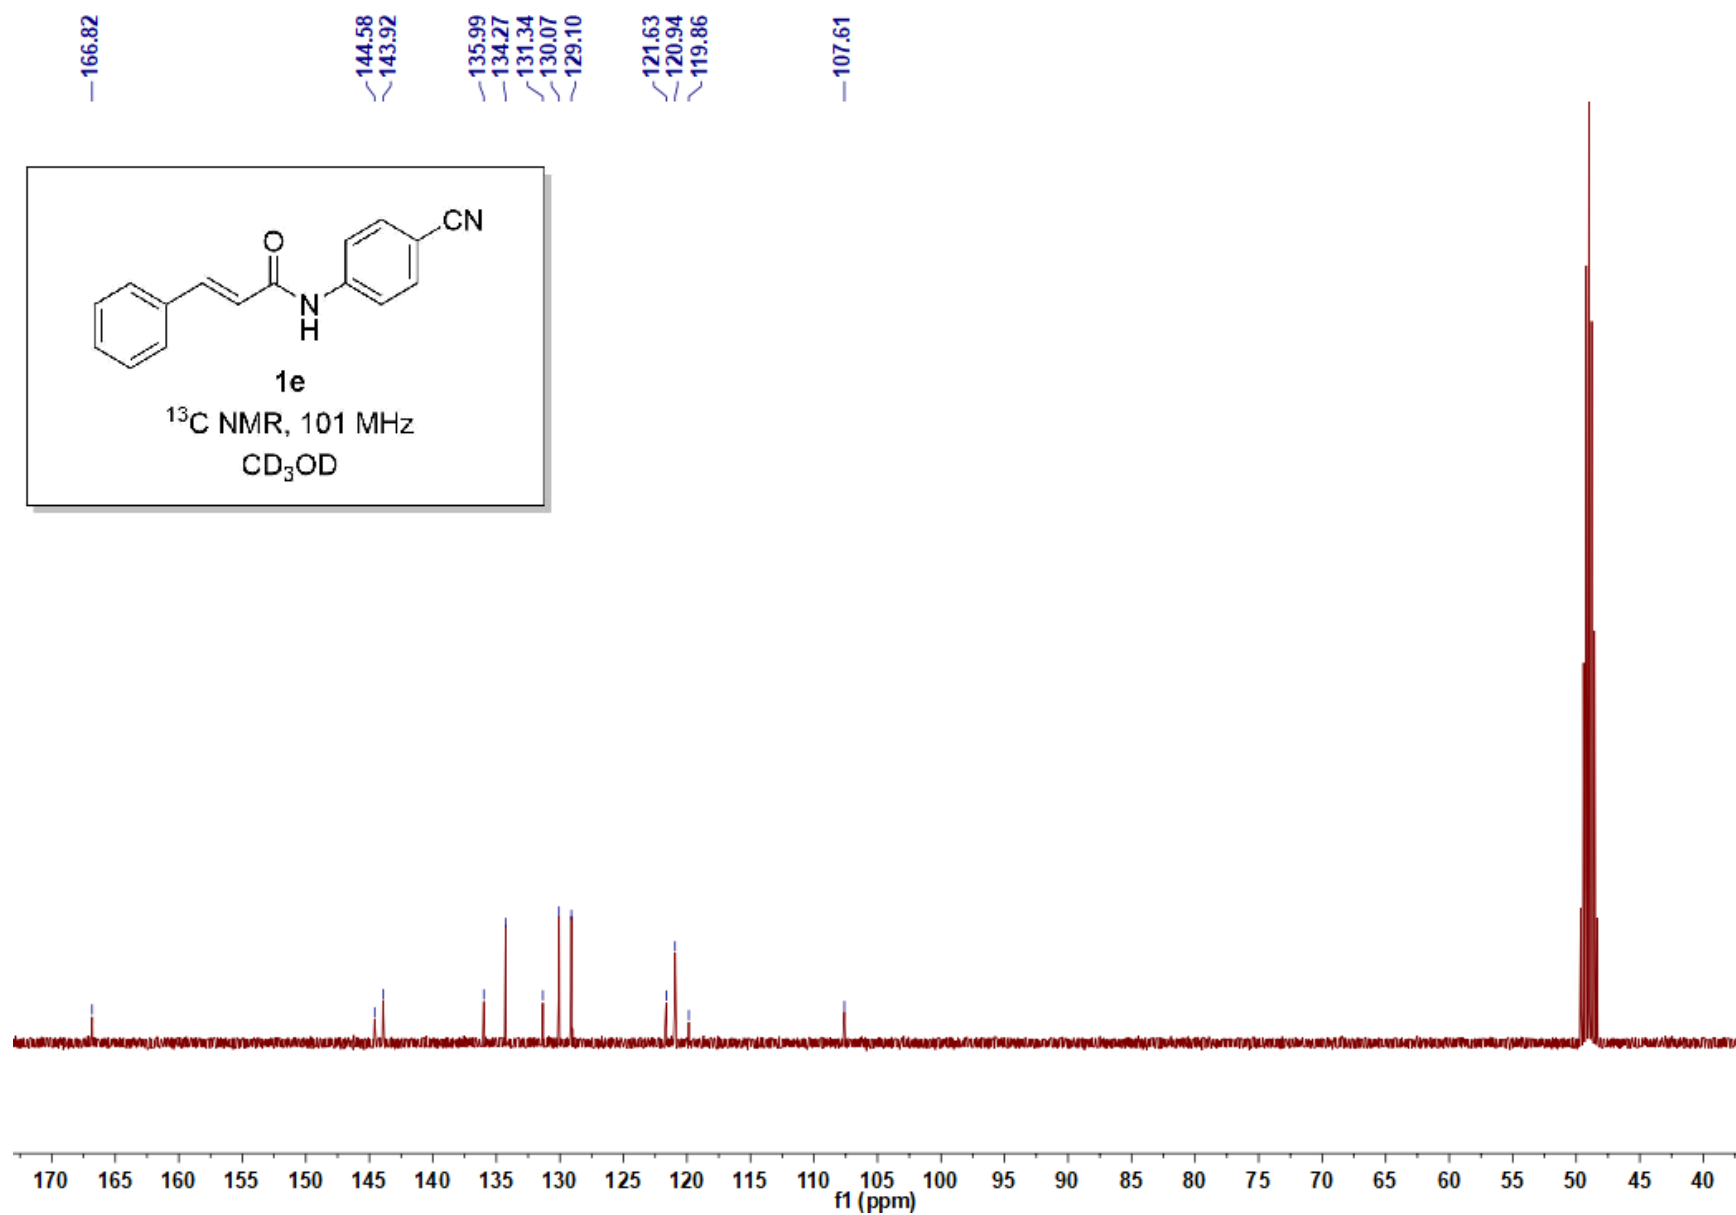

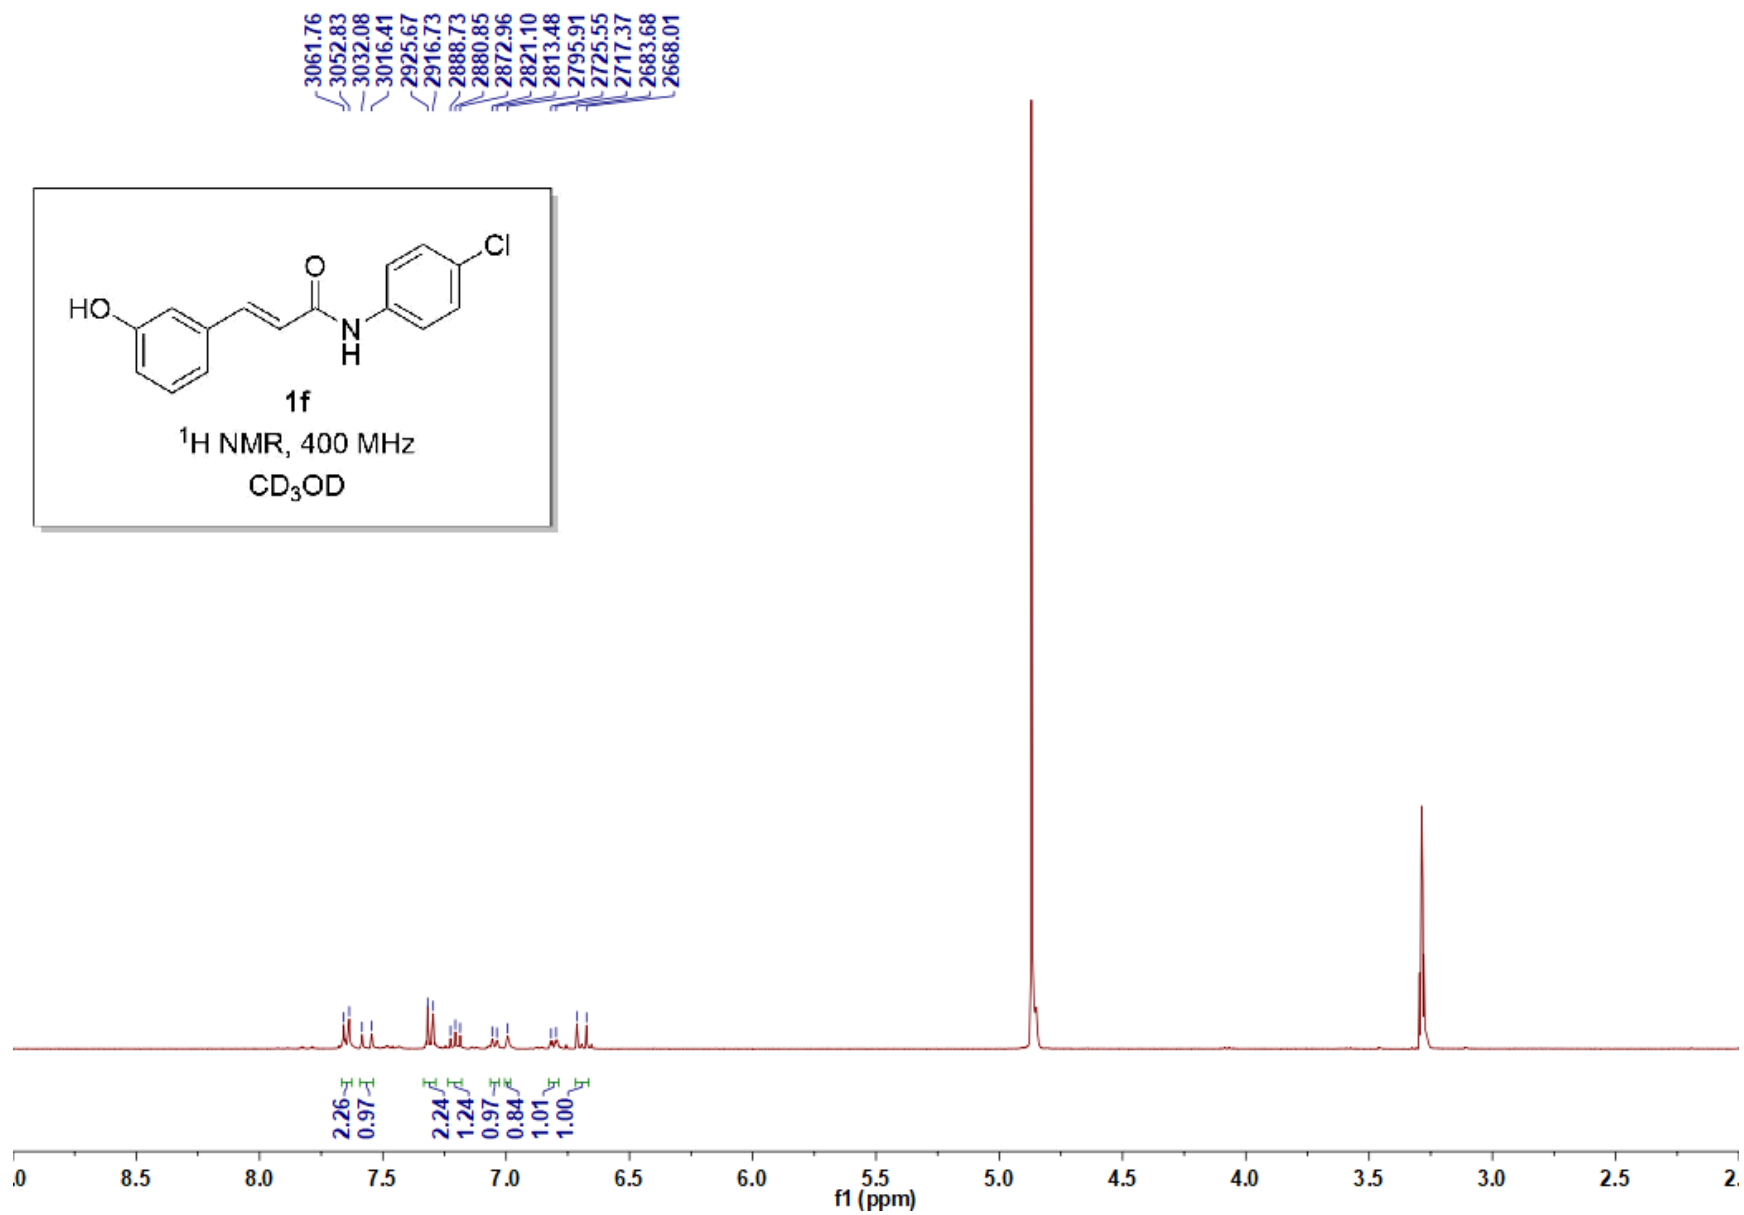

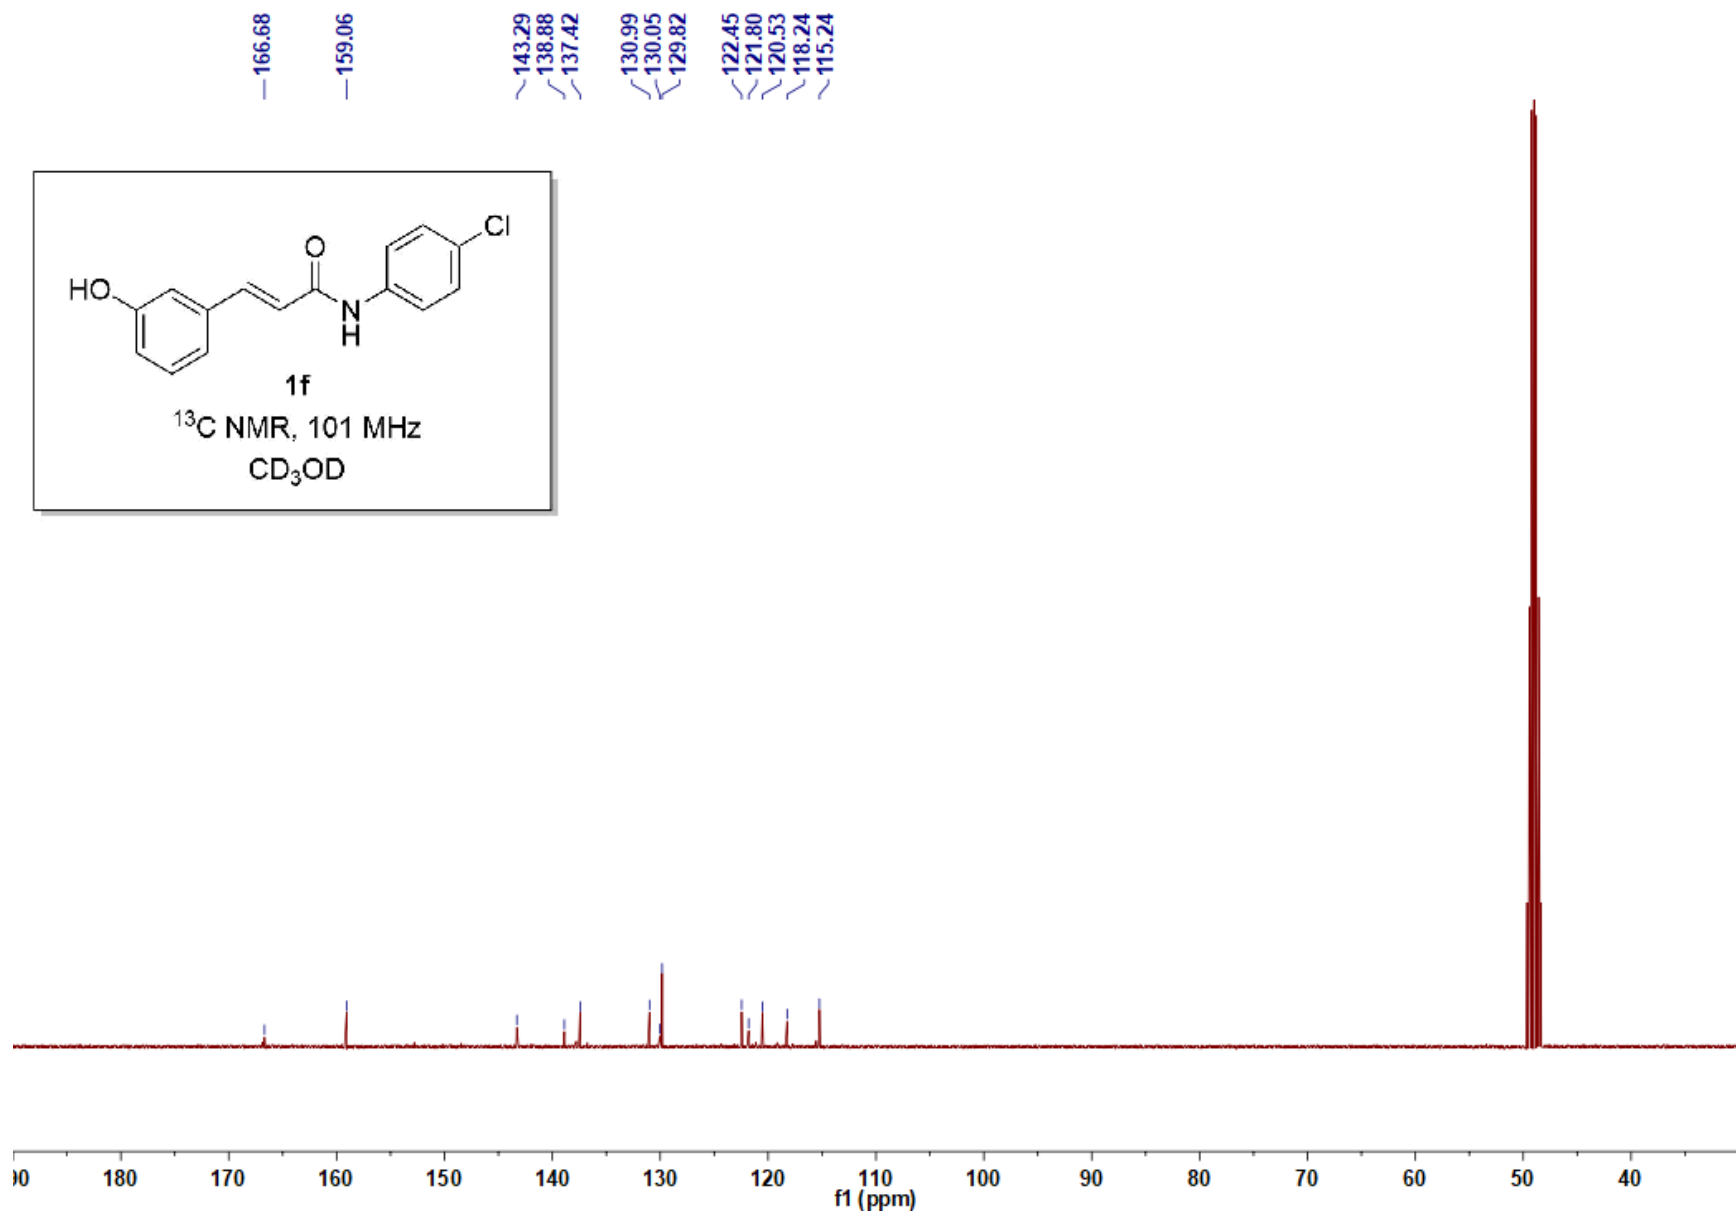

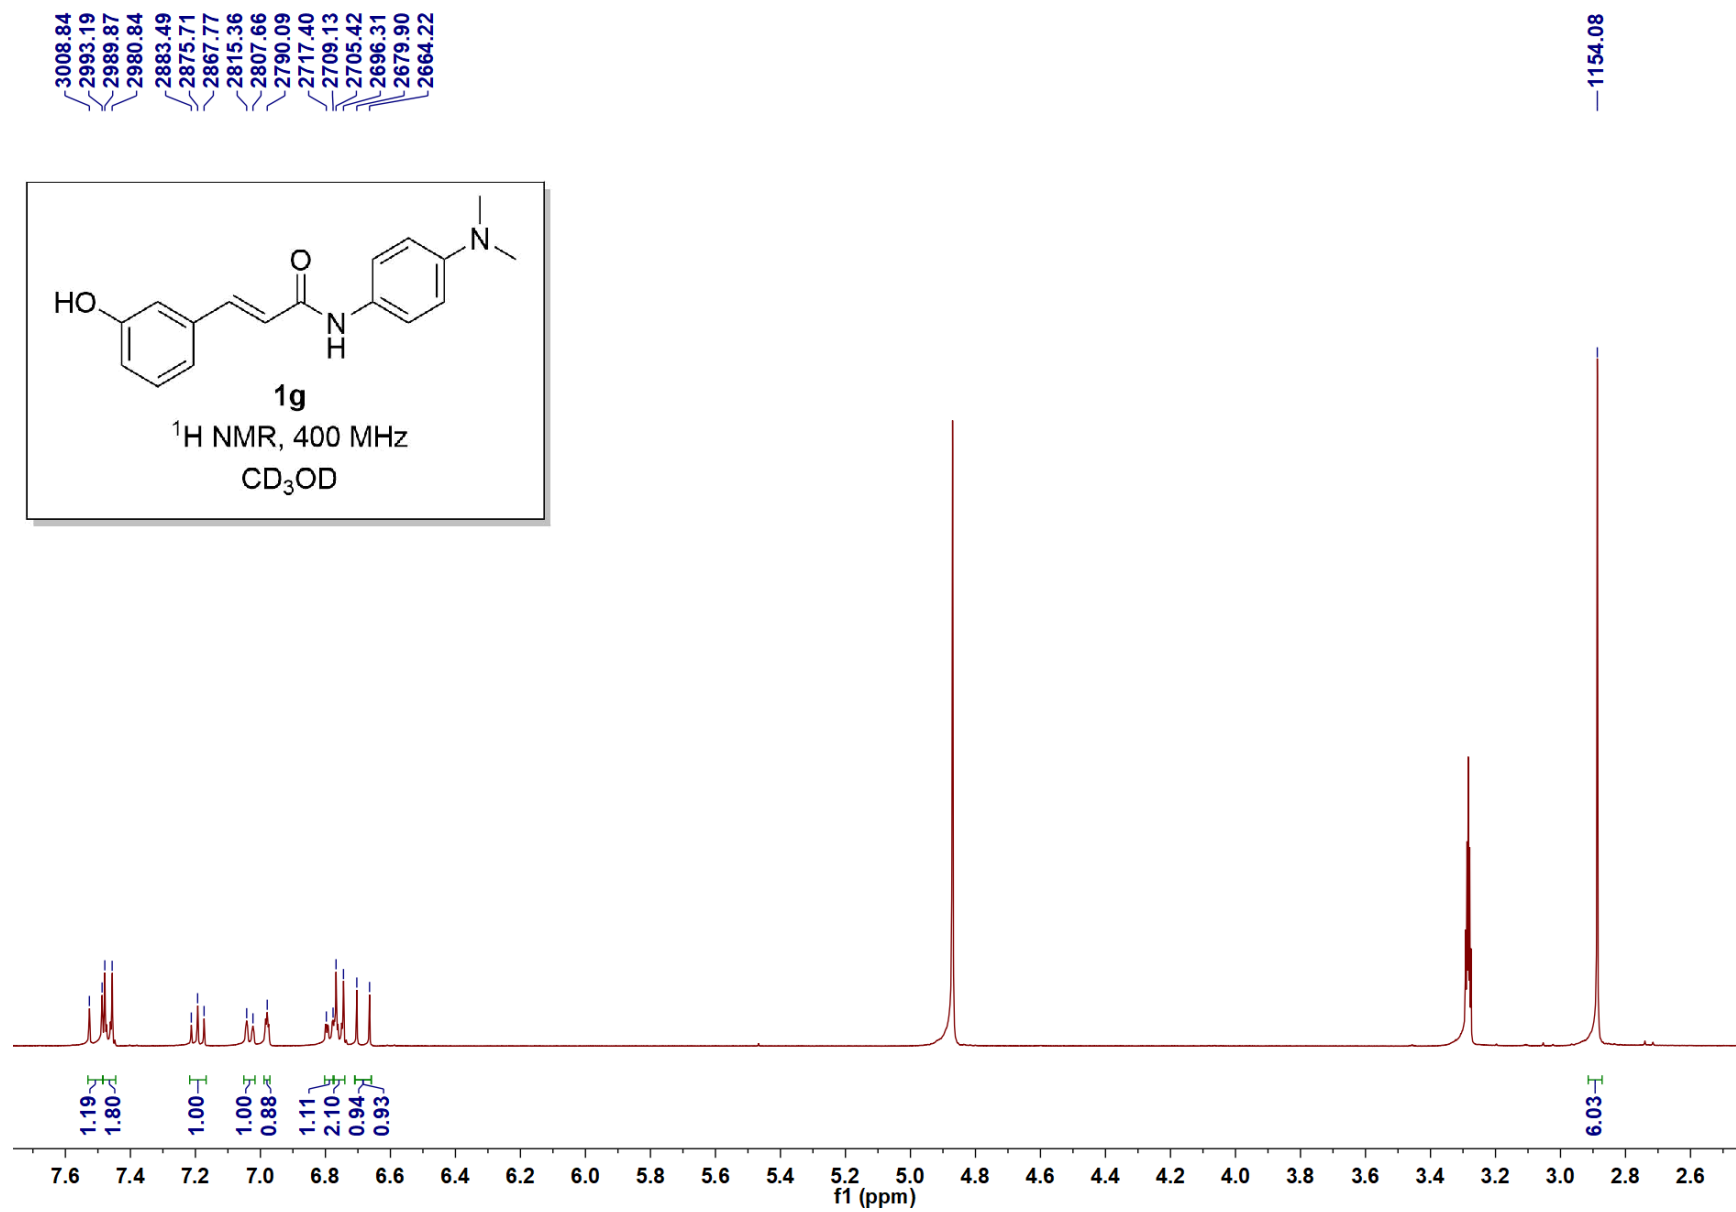

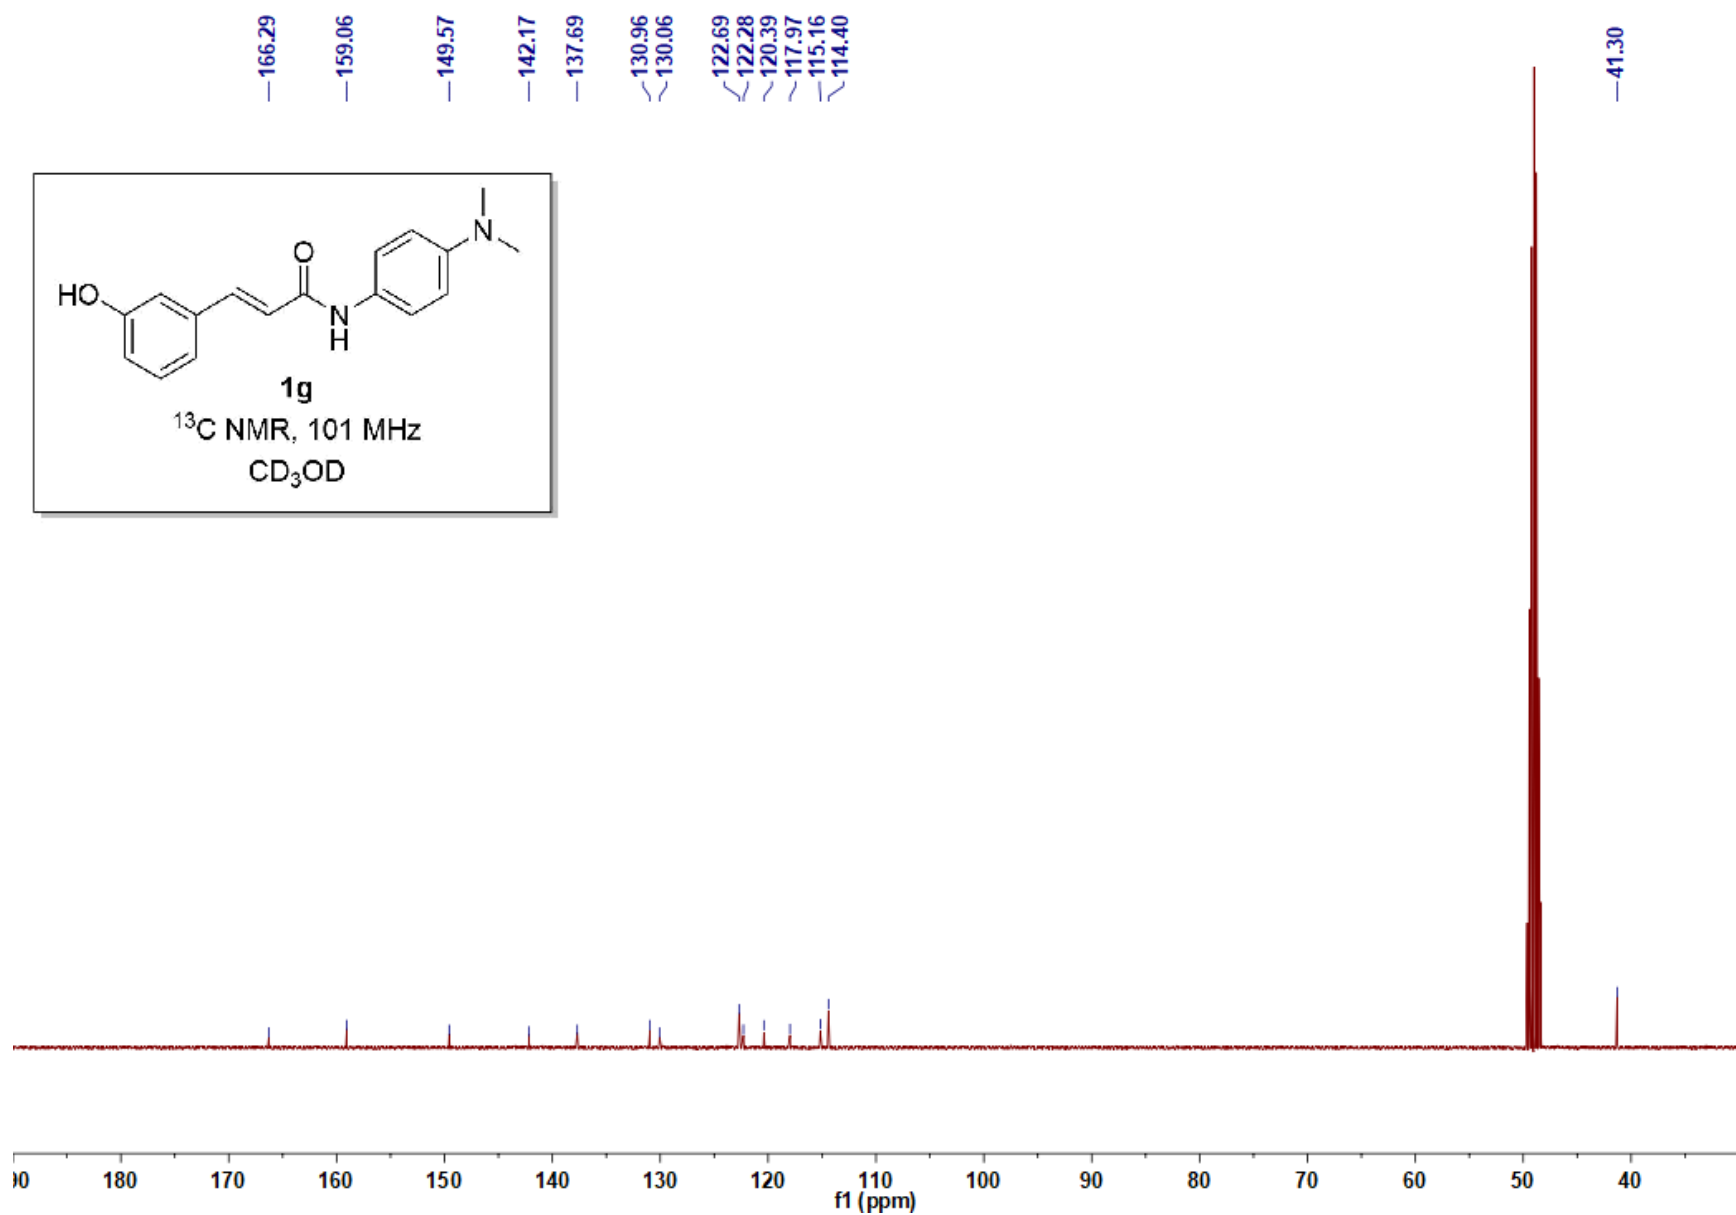

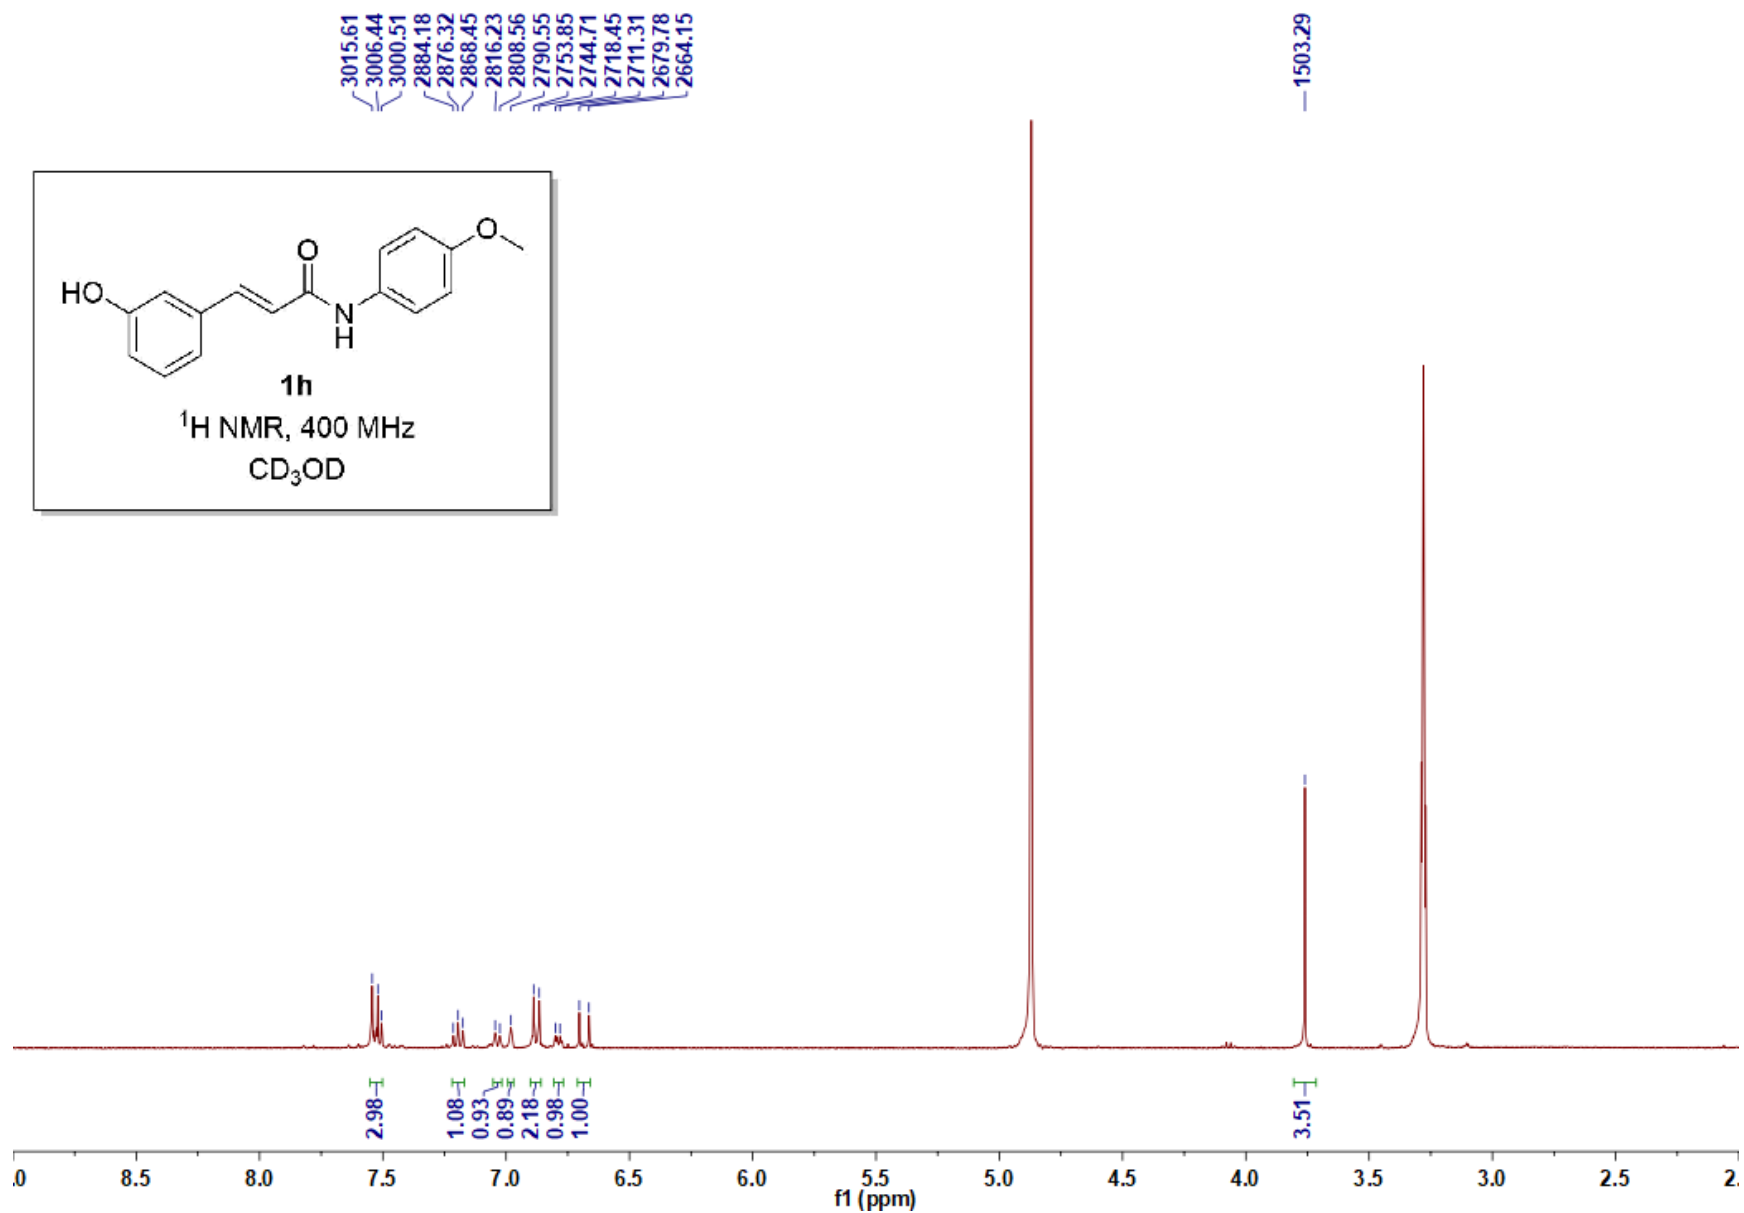



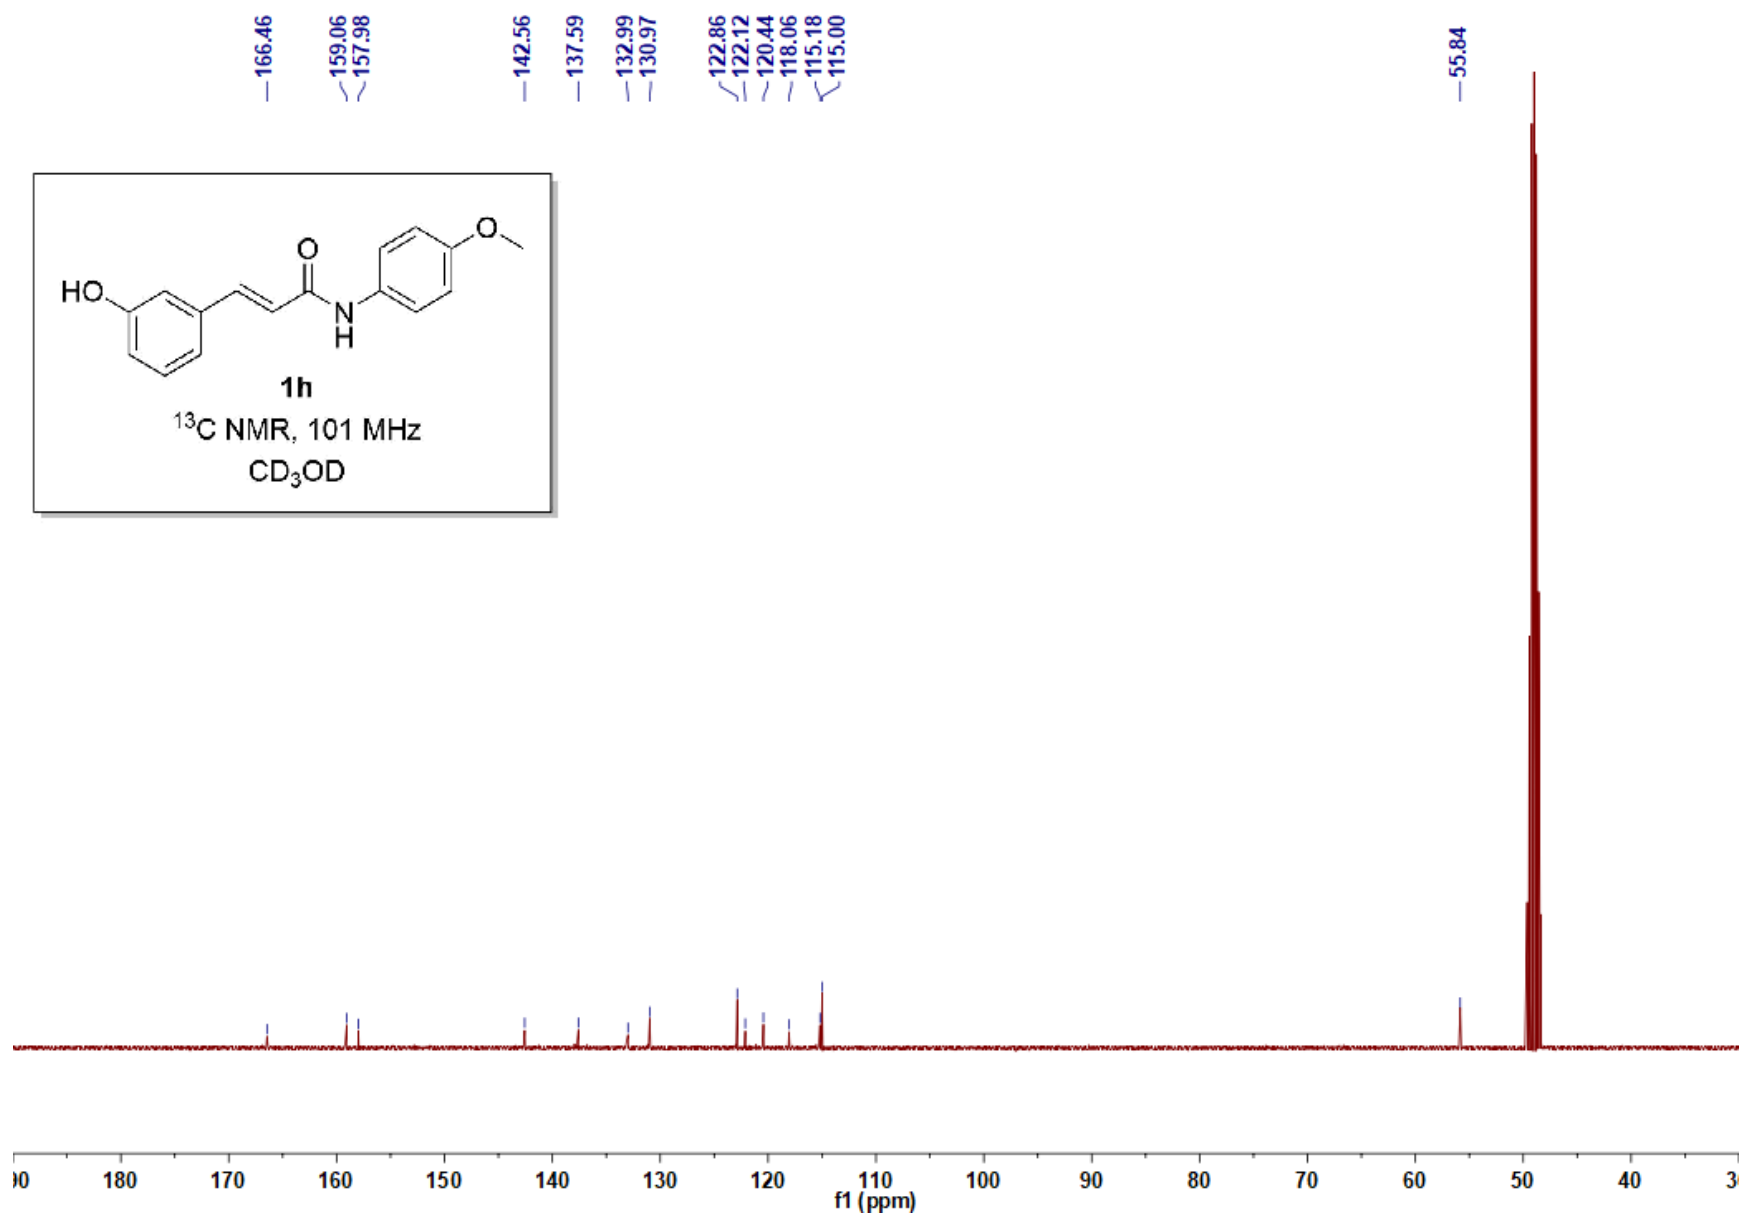

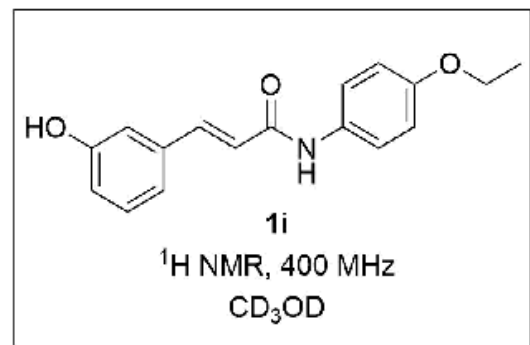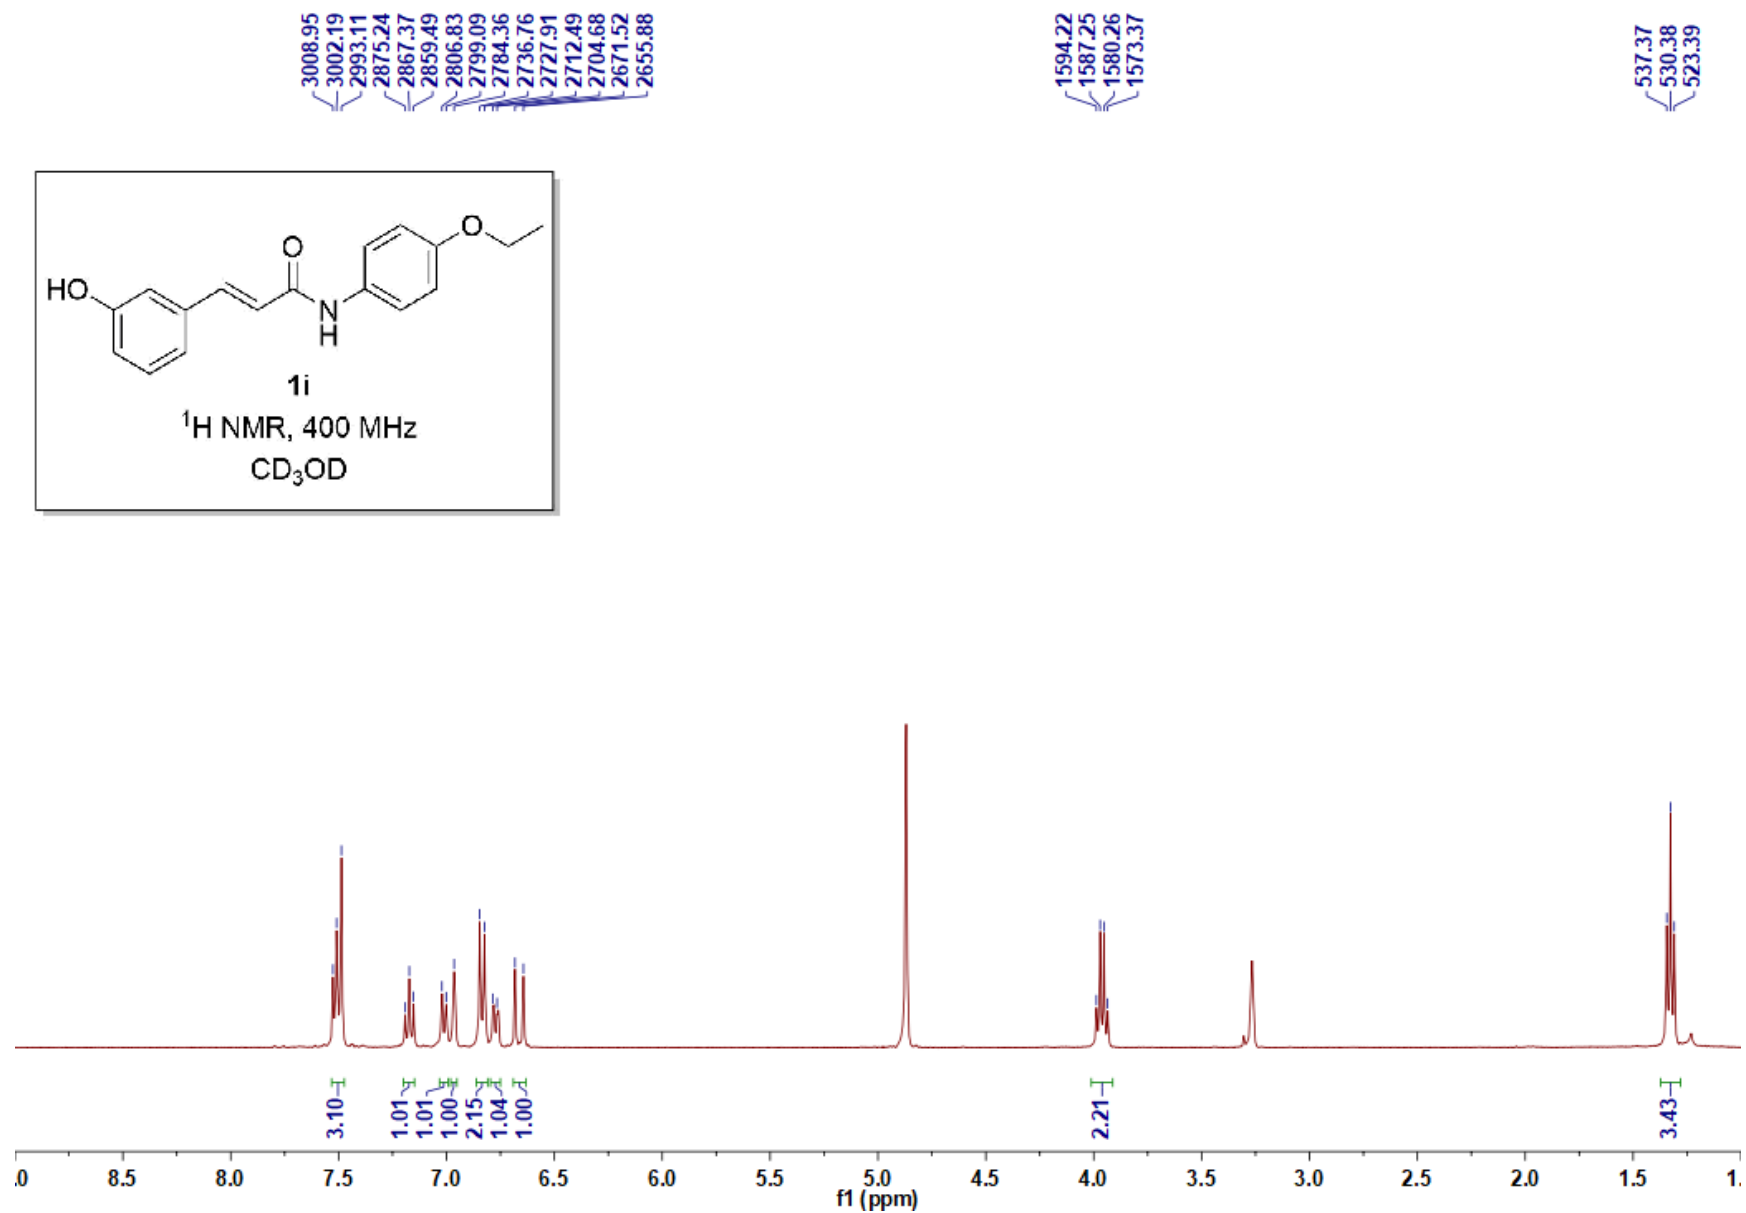

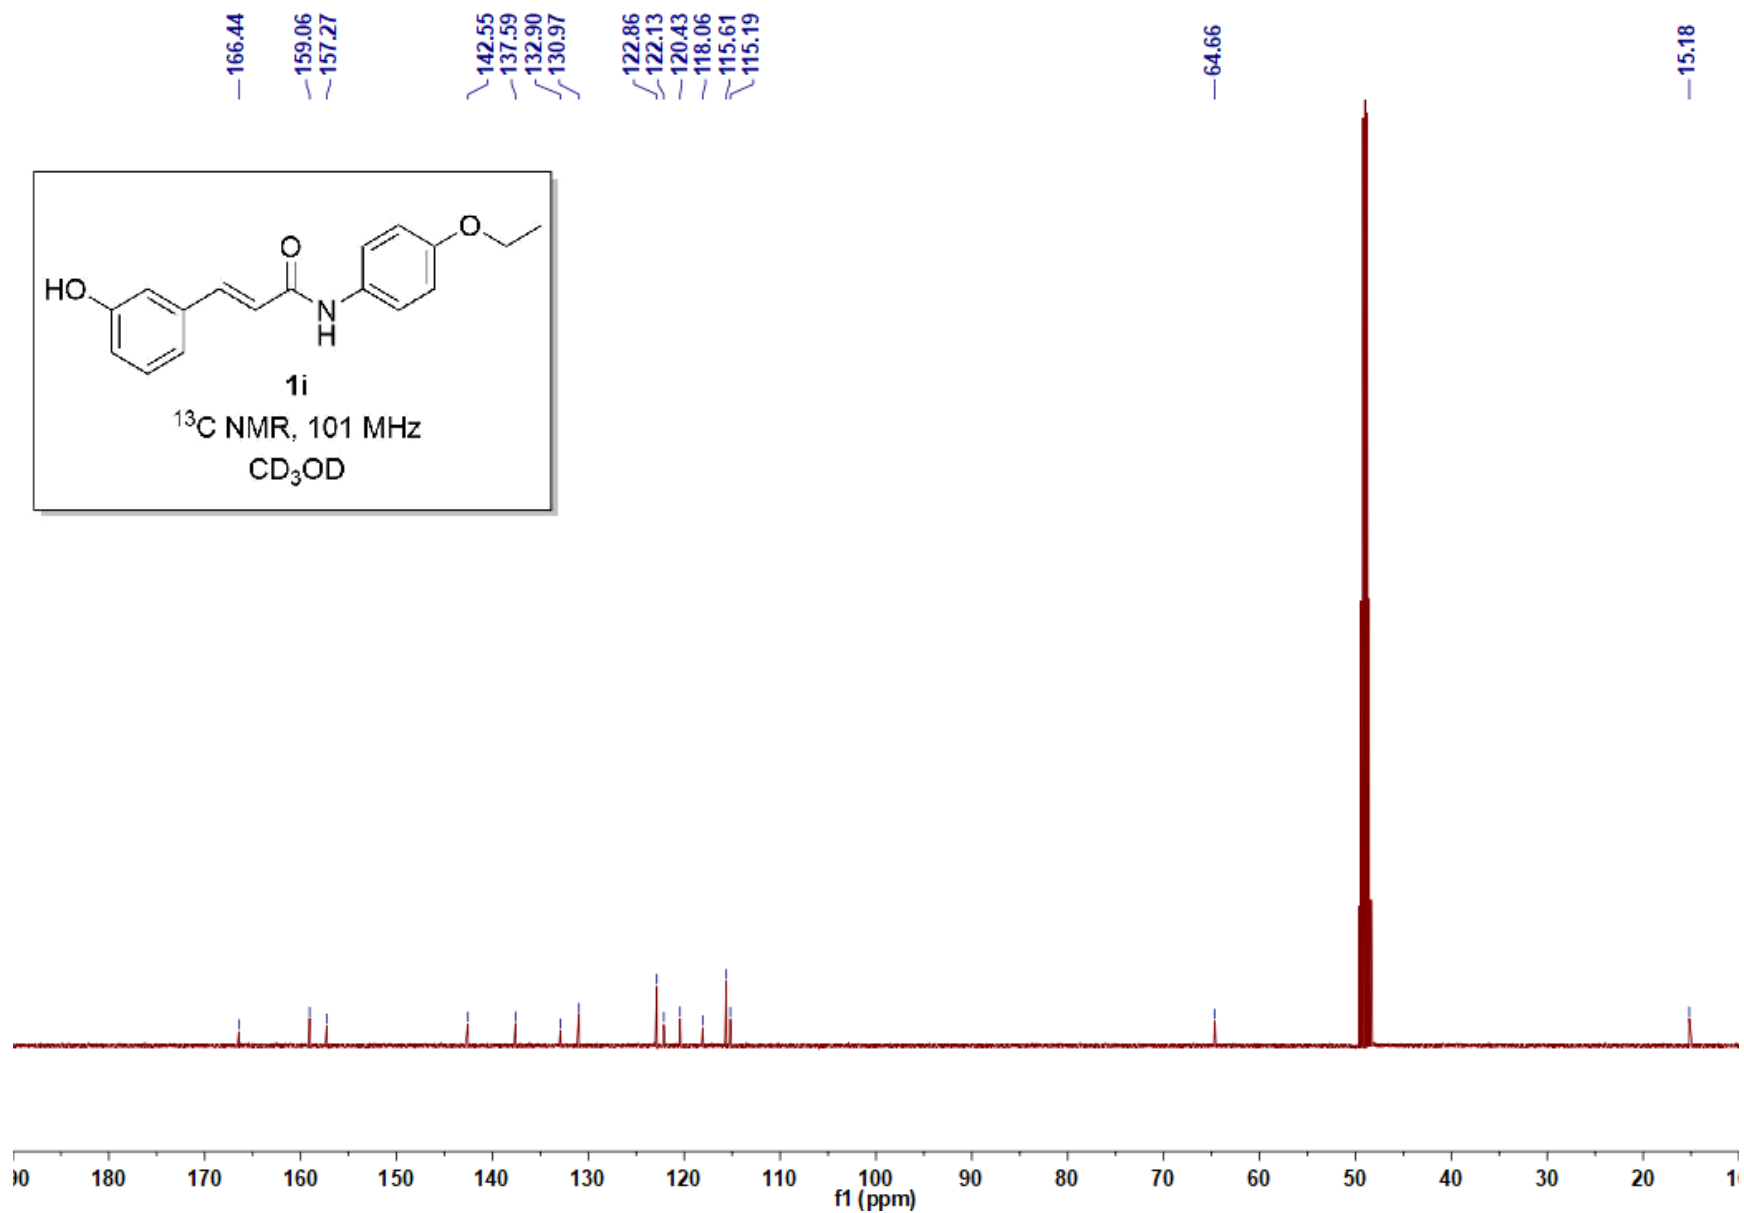

Supplement: s1 [file s1]
